# Supplementary material for: Spectroscopic characterization of the complexes of 2-(2′-pyridyl)-benzimidazole and (H2O)1,2, (CH3OH)1,2, and (NH3)1,2 isolated in the gas phase
Source: Royal Society of Chemistry journal article supplement (doi:10.1039/d4cp02244k), 2024-01-01
Supplement: d4cp02244k1.pdf [file d4cp02244k1.pdf]

Supporting Information for -

# Spectroscopic Characterization of the Complexes of 2-(2'-Pyridyl)-Benzimidazole and $(\text{H}_2\text{O})_{1,2}$ , $(\text{CH}_3\text{OH})_{1,2}$ , and $(\text{NH}_3)_{1,2}$ Isolated in the Gas Phase

Arkaprabha Sen<sup>a</sup>, Saurabh Khodia<sup>b,#</sup>, Ramesh Jarupula<sup>b,#</sup>, Simran Baweja<sup>b</sup>, Bhavika Kalal<sup>b</sup>, Surajit Maity<sup>a,b,\*</sup>

a. Center of Interdisciplinary Program, IIT Hyderabad, India.

b. Department of Chemistry, IIT Hyderabad, Telangana, India.

Email: surajitmaity@chy.iith.ac.in

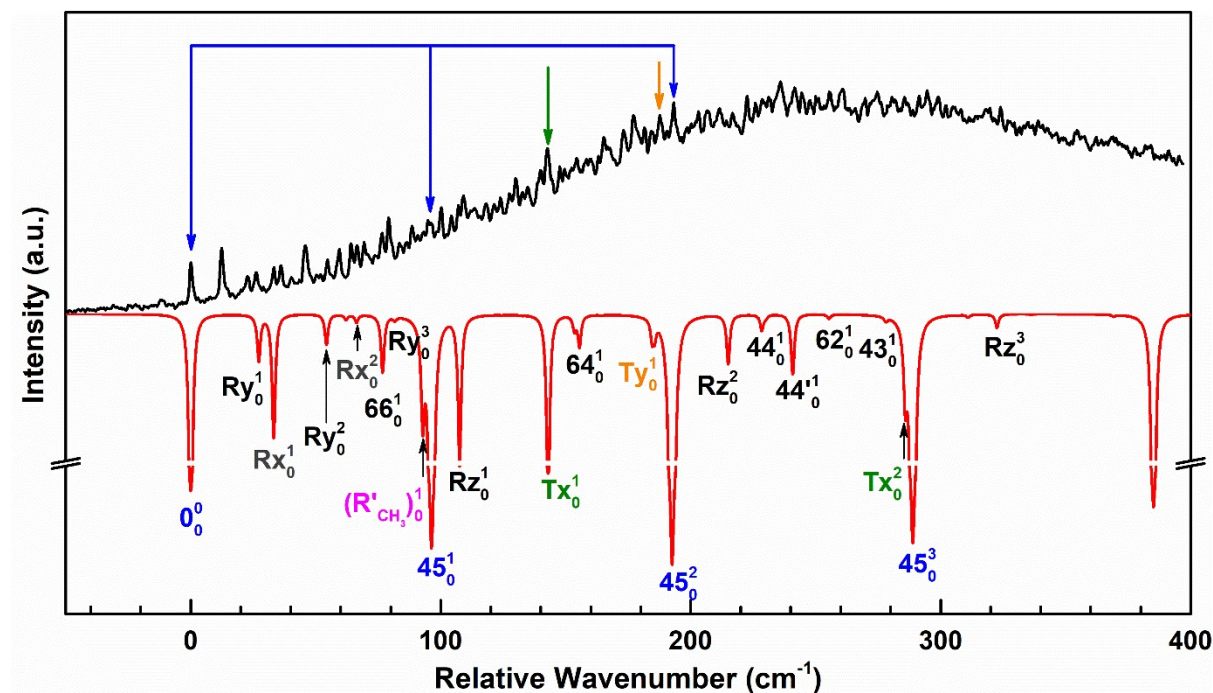

**Figure S1:** Frank-Condon simulation of PBI- $(\text{CH}_3\text{OH})_2$ -aa complex is compared with the experimental bands.
